# Supplementary material
Source: publisher figshare collection journal article supplement (https://acs.figshare.com/ndownloader/files/22019211)
Supplement: Supplementary file 1 [file 22019211]

## Sheet: About
		Supplementary Information: Accurate Modeling of Asphaltene Onset Pressure in Crude Oils Under Gas Injection Using Peng-Robinson Equation of State
			Mohammed I. L. Abutaqiya 1, Caleb J. Sisco 1, Yash Khemka 1,2, Muhieddine A. Safa 3, Ebtisam F. Ghloum 3, Abeer M. Rashed 3, Ridha Gharbi 4, Sriram Santhanagopalan 4, Misfera Al-Qahtani 4, Eman Al-Kandari 4, Francisco M. Vargas 1,2,*
			1 ENNOVA L.L.C., Stafford, TX 77477, USA
			2 Rice University, Department of Chemical and Biomolecular Engineering, Houston, TX 77007, USA
			3 Petroleum Research Center, Kuwait Institute for Scientific Research, P.O. Box: 24885, Safat 13109 Kuwait
			4 Kuwait Oil Company, P.O. Box 9758, Ahmadi 61008, Kuwait
			Authors Email Address: abutaqiya@ennova.us, sisco@ennova.us, khemka@ennova.us, msafa@kisr.edu.kw, efolad@kisr.edu.kw, arashed@kisr.edu.kw, rgharbi@kockw.com, ssanthanagopalan@kockw.com, mzqahtani@kockw.com, ekandari@kockw.com, vargas@ennova.us
			*Corresponding Author: email- vargas@ennova.us, Phone +1 (832) 835-1557
		This Excel workbook contains the compositional analysis of the four Middle Eastern crude oils studied in this work (ME-15, ME-36, ME-30, ME-13). Additionally, it contains the sets of binary interaction
		parameters that were used for all 10 crude oils after applying the correlations in eqs. 9 and 14 in the original manuscript.

## Sheet: Compositional Analysis
			ME-15									ME-36									ME-30									ME-13
	Name	MW	Flashed Gas		Flashed Liquid		Monophasic			Name	MW	Flashed Gas		Flashed Liquid		Monophasic			Name	MW	Flashed Gas		Flashed Liquid		Monophasic			Name	MW	Flashed Gas		Flashed Liquid		Monophasic
		g/mol	wt%	mol%	wt%	mol%	wt%	mol%			g/mol	wt%	mol%	wt%	mol%	wt%	mol%			g/mol	wt%	mol%	wt%	mol%	wt%	mol%			g/mol	wt%	mol%	wt%	mol%	wt%	mol%
	N2	28.01	0.89	0.68			0.13	0.4		N2	28.01	1.89	1.51			0.28	0.88		N2	28.01	12.74	11.01			2.22	6.59		N2	28.01	9.4	8.91			1.58	5.08
	CO2	44.01	2.52	1.22			0.38	0.72		CO2	44.01	2.71	1.38			0.4	0.81		CO2	44.01	2.86	1.57			0.5	0.94		CO2	44.01	5.55	3.35			0.94	1.91
	H2S	34.08	0	0			0	0		H2S	34.08	0	0			0	0		H2S	34.08	0	0			0	0		H2S	34.08	0	0			0	0
	C1	16.04	56.76	75.42			8.59	44.57		C1	16.04	51.62	72.21			7.66	42.08		C1	16.04	41.46	62.56			7.24	37.47		C1	16.04	31.41	51.97			5.3	29.64
	C2	30.07	20.61	14.61			3.12	8.63		C2	30.07	19.6	14.63			2.91	8.53		C2	30.07	16.55	13.33			2.89	7.98		C2	30.07	22.76	20.09			3.84	11.46
	C3	44.1	11.9	5.75	0.62	2.43	2.33	4.39		C3	44.1	12.72	6.47	0.68	2.79	2.47	4.94		C3	44.1	11.79	6.47	0.93	3.61	2.83	5.32		C3	44.1	16.45	9.9	0.45	1.77	3.15	6.41
	i-C4	58.12	1.18	0.43	0.29	0.88	0.42	0.61		i-C4	58.12	1.45	0.56	0.31	0.97	0.48	0.73		i-C4	58.12	1.48	0.62	0.38	1.11	0.57	0.81		i-C4	58.12	1.57	0.72	0.2	0.59	0.43	0.66
	n-C4	58.12	3.09	1.13	1.48	4.43	1.72	2.47		n-C4	58.12	4.19	1.62	1.56	4.83	1.95	2.96		n-C4	58.12	4.65	1.94	1.76	5.18	2.26	3.24		n-C4	58.12	5.86	2.68	1.3	3.89	2.07	3.2
	i-C5	72.15	0.6	0.18	0.97	2.35	0.91	1.05		i-C5	72.15	1.08	0.34	0.99	2.47	1	1.23		i-C5	72.15	1.42	0.48	1.08	2.55	1.14	1.31		i-C5	72.15	1.56	0.57	0.91	2.18	1.02	1.26
	n-C5	72.15	0.78	0.23	1.83	4.42	1.67	1.93		n-C5	72.15	1.63	0.51	1.9	4.73	1.86	2.27		n-C5	72.15	2.24	0.75	1.99	4.71	2.03	2.34		n-C5	72.15	2.5	0.92	1.91	4.59	2.01	2.5
	C6	84	0.48	0.12	3.49	7.23	3.03	3		C6	84	1.94	0.52	3.48	7.45	3.25	3.41		C6	84	2.51	0.72	3.65	7.43	3.45	3.41		C6	84	2.06	0.65	3.86	7.99	3.56	3.81
	C7	100.21	0.25	0.05	4.27	7.41	3.66	3.17		C7	100.21	0.86	0.19	4.05	7.28	3.58	3.15		Mcyclo-C5	84.16	0.15	0.04	0.28	0.58	0.26	0.26		Mcyclo-C5	84.16	0.1	0.03	0.28	0.58	0.25	0.27
	C8	114.23	0.84	0.16	5.07	7.73	4.43	3.44		C8	114.23	0.3	0.06	5.88	9.26	5.05	3.9		Benzene	78.11	0.07	0.02	0.12	0.26	0.11	0.12		Benzene	78.11	0.01	0	0.03	0.07	0.03	0.03
	C9	128.26	0.07	0.01	5.19	7.04	4.41	3.04		C9	128.26	0.03	0.01	4.72	6.62	4.02	2.76		Cyclo-C6	84.16	0.11	0.03	0.24	0.49	0.22	0.22		Cyclo-C6	84.16	0.04	0.01	0.2	0.41	0.17	0.18
	C10	134	0.03	0	5.46	7.09	4.64	2.88		C10	134	0	0	4.92	6.61	4.19	2.76		C7	100.21	1.13	0.27	3.67	6.26	3.23	2.68		C7	100.21	0.52	0.14	4.1	7.11	3.5	3.13
	C11	147			5.03	5.96	4.27	2.42		C11	147			4.48	5.48	3.81	2.29		Mcyclo-C6	98.19	0.12	0.03	0.47	0.83	0.41	0.35		Mcyclo-C6	98.19	0.04	0.01	0.43	0.76	0.36	0.33
	C12	161			4.62	5	3.92	2.03		C12	161			4.05	4.52	3.45	1.89		Toluene	92.14	0.06	0.02	0.49	0.92	0.42	0.38		Toluene	92.14	0.03	0.01	0.28	0.52	0.23	0.23
	C13	175			4.43	4.4	3.76	1.79		C13	175			3.84	3.94	3.27	1.65		C8	114.23	0.52	0.11	4.17	6.23	3.53	2.57		C8	114.23	0.13	0.03	4.67	7.09	3.9	3.07
	C14	190			4	3.66	3.39	1.49		C14	190			3.44	3.26	2.93	1.36		C2-Benzene	106.17	0.02	0	0.25	0.4	0.21	0.16		C2-Benzene	106.17	0.01	0	0.25	0.4	0.21	0.17
	C15	206			4.1	3.46	3.48	1.4		C15	206			3.45	3.01	2.93	1.26		m&p-Xylene	106.17	0.02	0.01	0.75	1.2	0.62	0.49		m&p-Xylene	106.17	0.01	0	0.69	1.13	0.57	0.49
	C16	222			3.78	2.96	3.21	1.2		C16	222			3.14	2.54	2.67	1.06		o-Xylene	106.17	0	0	0.27	0.43	0.22	0.17		o-Xylene	106.17	0	0	0.25	0.41	0.21	0.18
	C17	237			3.45	2.53	2.93	1.03		C17	237			2.84	2.15	2.42	0.9		C9	128.26	0.09	0.02	3.87	5.16	3.21	2.08		C9	128.26	0.03	0.01	4.3	5.82	3.58	2.5
	C18	251			3.25	2.25	2.76	0.91		C18	251			2.65	1.9	2.26	0.79		C10	134	0.02	0	5.35	6.83	4.42	2.74		C10	134	0.01	0	5.74	7.45	4.78	3.2
	C19	263			3.33	2.2	2.83	0.89		C19	263			2.69	1.84	2.29	0.77		C11	147			4.88	5.68	4.03	2.28		C11	147			5.22	6.17	4.34	2.65
	C20	275			3.14	1.99	2.66	0.81		C20	275			2.51	1.64	2.14	0.69		C12	161			4.42	4.69	3.64	1.88		C12	161			4.65	5.01	3.86	2.16
	C21	291			2.95	1.76	2.5	0.72		C21	291			2.32	1.43	1.97	0.6		C13	175			4.19	4.09	3.46	1.64		C13	175			4.28	4.25	3.56	1.83
	C22	300			2.81	1.6	2.38	0.65		C22	305			2.2	1.3	1.88	0.54		C14	190			3.77	3.39	3.11	1.36		C14	190			3.86	3.53	3.21	1.52
	C23	312			2.49	1.36	2.11	0.55		C23	318			1.95	1.1	1.66	0.46		C15	206			3.76	3.12	3.11	1.25		C15	206			3.79	3.2	3.15	1.38
	C24	324			2.38	1.25	2.02	0.51		C24	331			1.8	0.98	1.53	0.41		C16	222			3.42	2.63	2.82	1.06		C16	222			3.55	2.78	2.95	1.19
	C25	337			2.23	1.12	1.89	0.46		C25	345			1.69	0.88	1.44	0.37		C17	237			3.13	2.26	2.59	0.91		C17	237			3.28	2.4	2.73	1.03
	C26	349			2.11	1.02	1.79	0.41		C26	359			1.6	0.8	1.36	0.34		C18	251			2.9	1.98	2.4	0.79		C18	251			2.92	2.02	2.43	0.87
	C27	360			2.09	0.97	1.77	0.39		C27	374			1.57	0.75	1.33	0.31		C19	263			2.96	1.92	2.44	0.77		C19	263			2.95	1.95	2.46	0.84
	C28	372			1.99	0.89	1.69	0.36		C28	388			1.47	0.68	1.25	0.28		C20	275			2.75	1.71	2.27	0.69		C20	275			2.74	1.73	2.28	0.75
	C29	382			1.96	0.85	1.66	0.34		C29	402			1.43	0.64	1.22	0.27		C21	291			2.56	1.5	2.11	0.6		C21	291			2.57	1.53	2.13	0.66
	C30+	520.89			11.2	3.74	9.5	1.33		C30	416			1.34	0.58	1.15	0.24		C22	305			2.36	1.33	1.95	0.53		C22	305			2.42	1.38	2.01	0.59
	MW [g/mol]			21.3		173.1		82.4		C31	430			1.25	0.52	1.07	0.22		C23	318			2.15	1.16	1.78	0.46		C23	318			2.19	1.2	1.82	0.52
										C32	444			1.2	0.49	1.02	0.2		C24	331			1.98	1.02	1.63	0.41		C24	331			1.96	1.03	1.63	0.44
										C33	458			1.07	0.42	0.91	0.18		C25	345			1.88	0.93	1.55	0.37		C25	345			1.86	0.94	1.55	0.4
										C34	472			1.02	0.39	0.87	0.16		C26	359			1.72	0.82	1.42	0.33		C26	359			1.7	0.82	1.42	0.35
										C35	486			0.98	0.36	0.84	0.15		C27	374			1.71	0.78	1.41	0.31		C27	374			1.68	0.78	1.4	0.34
										C36+	520			15.55	5.38	13.24	2.24		C28	388			1.61	0.71	1.33	0.28		C28	388			1.57	0.71	1.31	0.3
										MW [g/mol]			22.4		179.9		88.1		C29	402			1.55	0.66	1.28	0.27		C29	402			1.5	0.65	1.25	0.28
																			C30	416			1.51	0.62	1.24	0.25		C30	416			1.42	0.59	1.18	0.26
																			C31	430			1.38	0.55	1.14	0.22		C31	430			1.32	0.53	1.1	0.23
																			C32	444			1.25	0.48	1.03	0.19		C32	444			1.25	0.49	1.04	0.21
																			C33	458			1.18	0.44	0.97	0.18		C33	458			1.11	0.42	0.92	0.18
																			C34	472			1.13	0.41	0.93	0.16		C34	472			1.05	0.39	0.88	0.17
																			C35	486			1.05	0.37	0.87	0.15		C35	486			0.98	0.35	0.81	0.15
																			C36+	604			9.06	2.57	7.48	1.03		C36+	604			8.35	2.4	6.94	1.03
																			MW [g/mol]			24.2		170.9		83.1		MW [g/mol]			26.5		173.7		89.8

## Sheet: BIP PR EOS
	Binary Interaction Parameters for PR EOS
	Crude S1												Crude U8
	BIP	N2	CO2	H2S	C1	C2	C3	HeavyGas	Saturates	A+R	Asph1		BIP	N2	CO2	H2S	C1	C2	C3	HeavyGas	Saturates	A+R	Asph1
	N2												N2
	CO2	-0.017											CO2	-0.017
	H2S	0.152	0.097										H2S	0.152	0.097
	C1	0.031	0.092	0.081									C1	0.031	0.092	0.081
	C2	0.0578	0.11337	0.076606	0.0154511								C2	0.0578	0.11337	0.076606	0.0154511
	C3	0.07248	0.11203	0.070559	0.0203843	0							C3	0.07248	0.11203	0.070559	0.0203843	0
	HeavyGas	0.075	0.12	0.07	-0.00301168	-0.00120164	-0.000328511						HeavyGas	0.075	0.12	0.07	-0.00269303	-0.00115572	-0.000374186
	Saturates	0.14	0.13	0.09	-0.011522	-0.00763744	-0.00504334	-0.00281043					Saturates	0.14	0.13	0.09	-0.00968621	-0.006527	-0.00439664	-0.00221963
	A+R	0.14	0.13	0.015	-0.0116384	-0.00773284	-0.00512127	-0.00286892	-3.04274e-07				A+R	0.14	0.13	0.015	-0.00686091	-0.00423691	-0.00255379	-0.000977634	-0.00025294
	Asph1	0.23	0.15	0.015	0.0647902	0.054195	0.0460705	0.0377762	0.0176315	0.0174581			Asph1	0.23	0.15	0.015	0.0651256	0.0545099	0.0463668	0.0364332	0.0166269	0.0225435
	Crude B7												Crude J1
	BIP	N2	CO2	H2S	C1	C2	C3	HeavyGas	Saturates	A+R	Asph1		BIP	N2	CO2	H2S	C1	C2	C3	HeavyGas	Saturates	A+R	Asph1
	N2												N2
	CO2	-0.017											CO2	-0.017
	H2S	0.152	0.097										H2S	0.152	0.097
	C1	0.031	0.092	0.081									C1	0.031	0.092	0.081
	C2	0.0578	0.11337	0.076606	0.0154511								C2	0.0578	0.11337	0.076606	0.0154511
	C3	0.07248	0.11203	0.070559	0.0203843	0							C3	0.07248	0.11203	0.070559	0.0203843	0
	HeavyGas	0.075	0.12	0.07	0.0189879	0.00851597	0.00299866						HeavyGas	0.075	0.12	0.07	0.0110339	0.00443018	0.0012198
	Saturates	0.14	0.13	0.09	0.057528	0.0385286	0.0255974	0.0113177					Saturates	0.14	0.13	0.09	0.0441279	0.0300022	0.0203332	0.0117604
	A+R	0.14	0.13	0.015	0.0701828	0.0492923	0.0346642	0.0177155	0.000739375				A+R	0.14	0.13	0.015	0.0564279	0.040528	0.0292881	0.0188758	0.000874832
	Asph1	0.23	0.15	0.015	0.0662556	0.0555716	0.0473663	0.0363841	0.0186063	0.0149392			Asph1	0.23	0.15	0.015	0.0716551	0.060662	0.052174	0.0433968	0.0204568	0.0155576
	Crude S14												Crude M1
	BIP	N2	CO2	H2S	C1	C2	C3	HeavyGas	Saturates	A+R	Asph1		BIP	N2	CO2	H2S	C1	C2	C3	HeavyGas	Saturates	A+R	Asph1
	N2												N2
	CO2	-0.017											CO2	-0.017
	H2S	0.152	0.097										H2S	0.152	0.097
	C1	0.031	0.092	0.081									C1	0.031	0.092	0.081
	C2	0.0578	0.11337	0.076606	0.0154511								C2	0.0578	0.11337	0.076606	0.0154511
	C3	0.07248	0.11203	0.070559	0.0203843	0							C3	0.07248	0.11203	0.070559	0.0203843	0
	HeavyGas	0.075	0.12	0.07	-0.00797874	-0.00312333	-0.000816503						HeavyGas	0.075	0.12	0.07	0.011241	0.00451005	0.00123941
	Saturates	0.14	0.13	0.09	-0.0285305	-0.0183818	-0.011736	-0.00636867					Saturates	0.14	0.13	0.09	0.0486091	0.033655	0.0233071	0.0140107
	A+R	0.14	0.13	0.015	-0.0324178	-0.0215324	-0.0142817	-0.00827899	-0.000125444				A+R	0.14	0.13	0.015	0.0537155	0.0380265	0.0270273	0.0169693	0.000148035
	Asph1	0.23	0.15	0.015	0.0607006	0.0503652	0.0424766	0.034807	0.0169557	0.0149144			Asph1	0.23	0.15	0.015	0.0531311	0.0433275	0.0359188	0.0284555	0.00916566	0.00776423
	Crude ME-15												Crude ME-36
	BIP	N2	CO2	H2S	C1	C2	C3	HeavyGas	Saturates	A+R	Asph1		BIP	N2	CO2	H2S	C1	C2	C3	HeavyGas	Saturates	A+R	Asph1
	N2												N2
	CO2	-0.017											CO2	-0.017
	H2S	0.152	0.097										H2S	0.152	0.097
	C1	0.031	0.092	0.081									C1	0.031	0.092	0.081
	C2	0.0578	0.11337	0.076606	0.0154511								C2	0.0578	0.11337	0.076606	0.0154511
	C3	0.07248	0.11203	0.070559	0.0203843	0							C3	0.07248	0.11203	0.070559	0.0203843	0
	HeavyGas	0.075	0.12	0.07	-0.0027038	-0.00107489	-0.000291174						HeavyGas	0.075	0.12	0.07	0.00468423	0.00189262	0.000531186
	Saturates	0.14	0.13	0.09	-0.0080108	-0.00496611	-0.00300916	-0.00143377					Saturates	0.14	0.13	0.09	0.0130958	0.00808866	0.00486354	0.00219707
	A+R	0.14	0.13	0.015	-0.0113427	-0.00767124	-0.00519098	-0.00303864	-0.000300446				A+R	0.14	0.13	0.015	0.0207562	0.0143957	0.0100125	0.00599736	0.000951033
	Asph1	0.23	0.15	0.015	0.0559937	0.0459806	0.0383834	0.0307893	0.0165911	0.0114424			Asph1	0.23	0.15	0.015	0.0601119	0.0498154	0.0419621	0.0337882	0.0195372	0.0121152
	Crude ME-30												Crude ME-13
	BIP	N2	CO2	H2S	C1	C2	C3	HeavyGas	Saturates	A+R	Asph1		BIP	N2	CO2	H2S	C1	C2	C3	HeavyGas	Saturates	A+R	Asph1
	N2												N2
	CO2	-0.017											CO2	-0.017
	H2S	0.152	0.097										H2S	0.152	0.097
	C1	0.031	0.092	0.081									C1	0.031	0.092	0.081
	C2	0.0578	0.11337	0.076606	0.0154511								C2	0.0578	0.11337	0.076606	0.0154511
	C3	0.07248	0.11203	0.070559	0.0203843	0							C3	0.07248	0.11203	0.070559	0.0203843	0
	HeavyGas	0.075	0.12	0.07	-0.0235632	-0.00975704	-0.00294657						HeavyGas	0.075	0.12	0.07	-0.0283655	-0.0110535	-0.00289269
	Saturates	0.14	0.13	0.09	-0.0602677	-0.0361397	-0.0210897	-0.00821924					Saturates	0.14	0.13	0.09	-0.0846579	-0.051189	-0.0303018	-0.0143407
	A+R	0.14	0.13	0.015	-0.0936961	-0.062543	-0.0419428	-0.0224597	-0.00346821				A+R	0.14	0.13	0.015	-0.129686	-0.08658	-0.0582301	-0.0347346	-0.00434472
	Asph1	0.23	0.15	0.015	0.0431209	0.0341422	0.0274701	0.0201847	0.0103478	0.00563103			Asph1	0.23	0.15	0.015	0.0413612	0.0325445	0.0260161	0.019858	0.00895914	0.00471818

## Sheet: BIP PC-SAFT EOS
	Binary Interaction Parameters for PC-SAFT EOS
	Crude S1												Crude U8
	BIP	N2	CO2	H2S	C1	C2	C3	HeavyGas	Saturates	A+R	Asph1		BIP	N2	CO2	H2S	C1	C2	C3	HeavyGas	Saturates	A+R	Asph1
	N2												N2
	CO2	0											CO2	0
	H2S	0.09	0.0678										H2S	0.09	0.0678
	C1	0.03	0.05	0.062									C1	0.03	0.05	0.062
	C2	0.04	0.097	0.058	0								C2	0.04	0.097	0.058	0
	C3	0.06	0.1	0.05	0	0							C3	0.06	0.1	0.05	0	0
	HeavyGas	0.075	0.12	0.07	-0.00202143	-0.000912456	-0.00026697						HeavyGas	0.075	0.12	0.07	0.00430432	0.00205423	0.000687208
	Saturates	0.08	0.13	0.09	-0.00706005	-0.00482119	-0.00310072	-0.00155513					Saturates	0.08	0.13	0.09	0.0142459	0.00990326	0.00651688	0.0030028
	A+R	0.08	0.1	0.015	-0.00817795	-0.00575773	-0.00386364	-0.00211012	-4.26497e-05				A+R	0.08	0.1	0.015	0.0123847	0.00834683	0.00525732	0.00216322	6.95515e-05
	Asph1	0.16	0.18	0.015	0.07	0	0	0.01	-0.004	0			Asph1	0.16	0.18	0.015	0.07	0	0	0.01	-0.004	0
	Crude B7												Crude J1
	BIP	N2	CO2	H2S	C1	C2	C3	HeavyGas	Saturates	A+R	Asph1		BIP	N2	CO2	H2S	C1	C2	C3	HeavyGas	Saturates	A+R	Asph1
	N2												N2
	CO2	0											CO2	0
	H2S	0.09	0.0678										H2S	0.09	0.0678
	C1	0.03	0.05	0.062									C1	0.03	0.05	0.062
	C2	0.04	0.097	0.058	0								C2	0.04	0.097	0.058	0
	C3	0.06	0.1	0.05	0	0							C3	0.06	0.1	0.05	0	0
	HeavyGas	0.075	0.12	0.07	-0.000497005	-0.000243843	-8.70986e-05						HeavyGas	0.075	0.12	0.07	0.00428255	0.00193937	0.000570204
	Saturates	0.08	0.13	0.09	-0.00143807	-0.000981426	-0.000630288	-0.000250556					Saturates	0.08	0.13	0.09	0.0158376	0.0110141	0.00725077	0.00378948
	A+R	0.08	0.1	0.015	-0.00181975	-0.00130314	-0.000894257	-0.000426769	-2.35563e-05				A+R	0.08	0.1	0.015	0.0214296	0.0158102	0.0112662	0.00684618	0.000459356
	Asph1	0.16	0.18	0.015	0.07	0	0	0.01	-0.004	0			Asph1	0.16	0.18	0.015	0.07	0	0	0.01	-0.004	0
	Crude S14												Crude M1
	BIP	N2	CO2	H2S	C1	C2	C3	HeavyGas	Saturates	A+R	Asph1		BIP	N2	CO2	H2S	C1	C2	C3	HeavyGas	Saturates	A+R	Asph1
	N2												N2
	CO2	0											CO2	0
	H2S	0.09	0.0678										H2S	0.09	0.0678
	C1	0.03	0.05	0.062									C1	0.03	0.05	0.062
	C2	0.04	0.097	0.058	0								C2	0.04	0.097	0.058	0
	C3	0.06	0.1	0.05	0	0							C3	0.06	0.1	0.05	0	0
	HeavyGas	0.075	0.12	0.07	-0.000648197	-0.000288979	-8.17918e-05						HeavyGas	0.075	0.12	0.07	0.00380546	0.00172209	0.00050553
	Saturates	0.08	0.13	0.09	-0.0020946	-0.00139912	-0.000871332	-0.000421264					Saturates	0.08	0.13	0.09	0.0151648	0.0107043	0.00719377	0.00392225
	A+R	0.08	0.1	0.015	-0.00269805	-0.00190294	-0.00127942	-0.000718477	-3.98361e-05				A+R	0.08	0.1	0.015	0.0174705	0.0126782	0.00884274	0.00517362	8.84552e-05
	Asph1	0.16	0.18	0.015	0.07	0	0	0.01	-0.004	0			Asph1	0.16	0.18	0.015	0.07	0	0	0.01	-0.004	0
	Crude ME-15												Crude ME-36
	BIP	N2	CO2	H2S	C1	C2	C3	HeavyGas	Saturates	A+R	Asph1		BIP	N2	CO2	H2S	C1	C2	C3	HeavyGas	Saturates	A+R	Asph1
	N2												N2
	CO2	0											CO2	0
	H2S	0.09	0.0678										H2S	0.09	0.0678
	C1	0.03	0.05	0.062									C1	0.03	0.05	0.062
	C2	0.04	0.097	0.058	0								C2	0.04	0.097	0.058	0
	C3	0.06	0.1	0.05	0	0							C3	0.06	0.1	0.05	0	0
	HeavyGas	0.075	0.12	0.07	-0.00760272	-0.00341725	-0.000991944						HeavyGas	0.075	0.12	0.07	-0.00379638	-0.00172578	-0.000514625
	Saturates	0.08	0.13	0.09	-0.0207636	-0.0133166	-0.0078255	-0.00324736					Saturates	0.08	0.13	0.09	-0.00985854	-0.00629253	-0.00366537	-0.00143718
	A+R	0.08	0.1	0.015	-0.0314138	-0.0220734	-0.014801	-0.0081369	-0.00110487				A+R	0.08	0.1	0.015	-0.0165974	-0.0118784	-0.00815408	-0.00459079	-0.000895424
	Asph1	0.16	0.18	0.015	-0.0126793	-0.0110158	-0.00954319	-0.00793702	-0.004	0			Asph1	0.16	0.18	0.015	-0.0177141	-0.015813	-0.014104	-0.0121511	-0.004	0
	Crude ME-30												Crude ME-13
	BIP	N2	CO2	H2S	C1	C2	C3	HeavyGas	Saturates	A+R	Asph1		BIP	N2	CO2	H2S	C1	C2	C3	HeavyGas	Saturates	A+R	Asph1
	N2												N2
	CO2	0											CO2	0
	H2S	0.09	0.0678										H2S	0.09	0.0678
	C1	0.03	0.05	0.062									C1	0.03	0.05	0.062
	C2	0.04	0.097	0.058	0								C2	0.04	0.097	0.058	0
	C3	0.06	0.1	0.05	0	0							C3	0.06	0.1	0.05	0	0
	HeavyGas	0.075	0.12	0.07	-0.0235662	-0.0109186	-0.00344781						HeavyGas	0.075	0.12	0.07	-0.0246049	-0.0109099	-0.00308544
	Saturates	0.08	0.13	0.09	-0.0559334	-0.0349243	-0.0197964	-0.00667194					Saturates	0.08	0.13	0.09	-0.0668695	-0.0421382	-0.0242616	-0.00995989
	A+R	0.08	0.1	0.015	-0.0916909	-0.0637582	-0.0423582	-0.021407	-0.00413299				A+R	0.08	0.1	0.015	-0.10693	-0.0744252	-0.0495654	-0.0275902	-0.00432693
	Asph1	0.16	0.18	0.015	-0.0685224	-0.0607289	-0.0537767	-0.0453669	-0.004	0			Asph1	0.16	0.18	0.015	-0.0666894	-0.0589853	-0.0521203	-0.0447453	-0.004	0
